# Supplementary material
Source: PubMed Central journal article supplement (PMC5423784)

Figure S1

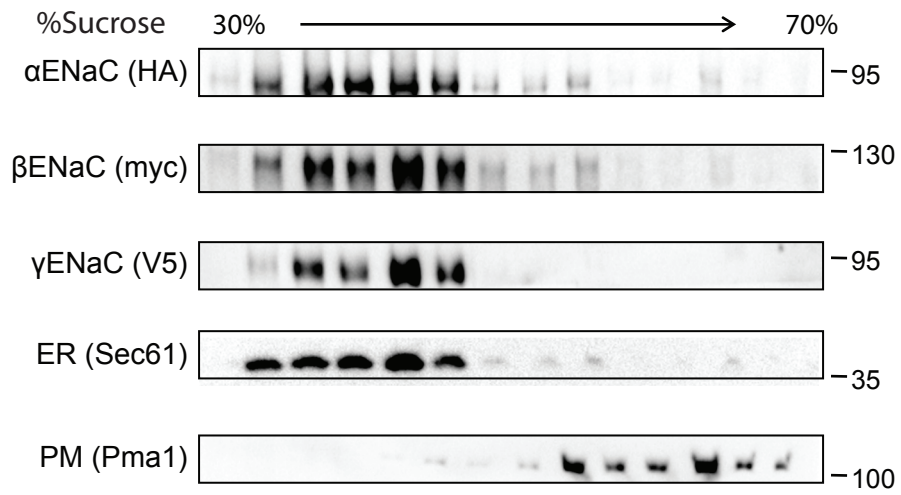

Supplement: NIHMS857025-supplement-supplemental.pdf [file NIHMS857025-supplement-supplemental.pdf]
